# Supplementary material for: Activation of Abl1 Kinase Explored Using Well-Tempered Metadynamics Simulations on an Essential Dynamics Sampled Path
Source: PubMed Central journal article supplement (PMC8582261; doi:10.1021/acs.jctc.1c00505), 2021-10-14
Supplement: ct1c00505_si_001.pdf [file ct1c00505_si_001.pdf]

Activation of Abl1 Kinase Explored using  
Well-Tempered Metadynamics Simulations on  
an Essential Dynamics Sampled Path  
Supporting Information

Baswanth Oruganti and Ran Friedman\*

*Department of Chemistry and Biomedical Sciences, Faculty of Health and Life Sciences,  
Linnæus University, 391 82 Kalmar, Sweden*

E-mail: [ran.friedman@lnu.se](mailto:ran.friedman@lnu.se)

Table S1: Full backbone RMSD (in Å) of the two intermediate structures in the proposed mechanism with respect to the corresponding Abl1 conformations reported previously by Meng *et al.*<sup>a</sup>

| Conformation ID | RMSD of intermediate-1 (bin 11) | RMSD of intermediate-2 (bin 15) |
|-----------------|---------------------------------|---------------------------------|
| 1 <sup>b</sup>  | 3.56                            | <b>2.53</b>                     |
| 2               | 3.73                            | 2.74                            |
| 3               | 3.33                            | 4.57                            |
| 4 <sup>b</sup>  | 3.54                            | <b>2.32</b>                     |
| 5               | 3.59                            | 4.68                            |
| 6               | 3.76                            | 2.61                            |
| 7 <sup>c</sup>  | <b>2.77</b>                     | 3.45                            |
| 8               | 3.93                            | 3.23                            |
| 9 <sup>c</sup>  | <b>2.71</b>                     | 3.22                            |
| 10              | 3.61                            | 3.28                            |
| 11              | 3.33                            | 3.28                            |
| 12              | 4.25                            | 5.55                            |
| 13              | 3.63                            | 2.61                            |
| 14 <sup>c</sup> | <b>2.81</b>                     | 3.74                            |
| 15              | 3.67                            | 4.98                            |
| 16              | 3.76                            | 2.71                            |

<sup>a</sup> See Reference 11 of the main manuscript. The backbone atoms of the two intermediates are aligned with those of the conformations reported in the Reference 11 before computing RMSD values.

<sup>b</sup> Conformations proximate to intermediate-2.

<sup>c</sup> Conformations proximate to intermediate-1.

Table S2: Converged errors (kcal/mol) in the estimated free energies of MFEP configurations for the non-phos and phos systems.

| Bin index | non-phos | phos |
|-----------|----------|------|
| 1         | 0.2      | 0.5  |
| 2         | 0.2      | 0.3  |
| 3         | 0.2      | 0.4  |
| 4         | 0.2      | 0.4  |
| 5         | 0.2      | 0.4  |
| 6         | 0.3      | 0.4  |
| 7         | 0.4      | 0.3  |
| 8         | 0.4      | 0.4  |
| 9         | 0.4      | 0.4  |
| 10        | 0.4      | 0.4  |
| 11        | 0.5      | 0.5  |
| 12        | 0.5      | 0.5  |
| 13        | 0.4      | 0.4  |
| 14        | 0.4      | 0.3  |
| 15        | 0.4      | 0.3  |
| 16        | 0.3      | 0.3  |
| 17        | 0.4      | 0.3  |
| 18        | 0.3      | 0.3  |
| 19        | 0.3      | 0.3  |
| 20        | 0.2      | 0.3  |
| 21        | 0.3      | 0.3  |
| 22        | 0.3      | 0.3  |
| 23        | 0.3      | 0.4  |
| 24        | 0.3      | 0.5  |
| 25        | 0.4      | 0.4  |

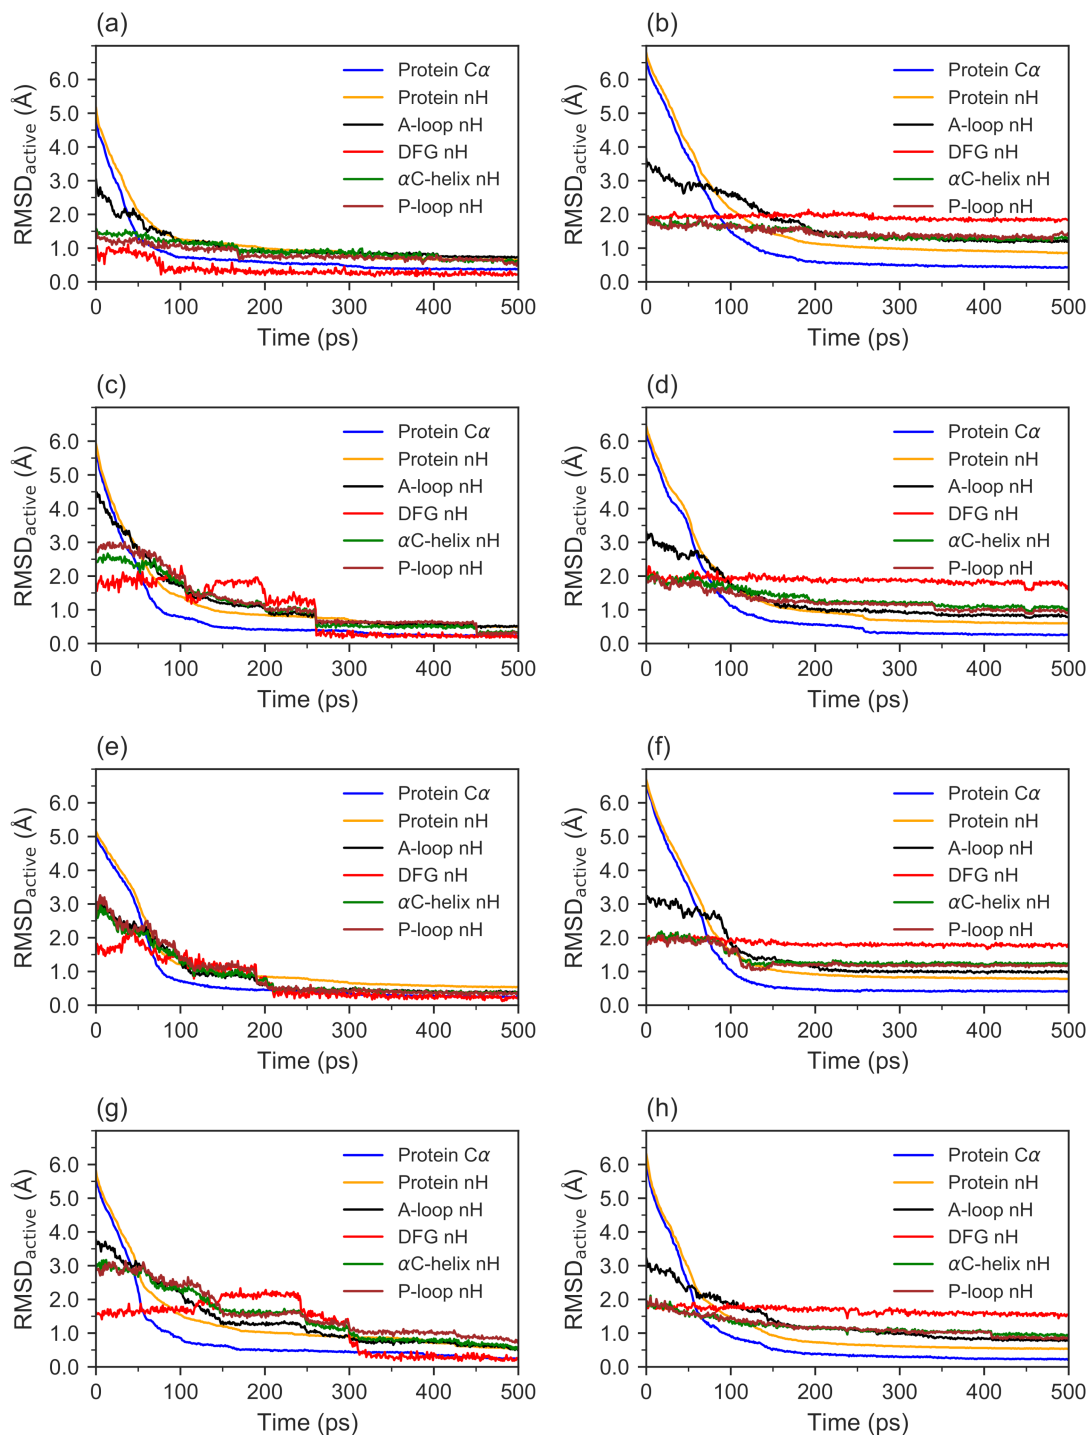

Figure S1: Variation in RMSD relative to the target active state ( $RMSD_{active}$ ) of the non-phos (left panel: (a), (c), (e), (g)) and the phos (right panel: (b), (d), (f), (h)) systems during four different EDS simulations. Before each type of RMSD calculation, EDS structures were fitted to the active state using either the C $\alpha$  (for C $\alpha$ -RMSD) or non-hydrogen (for nH-RMSD) atoms of only the structural element under consideration.

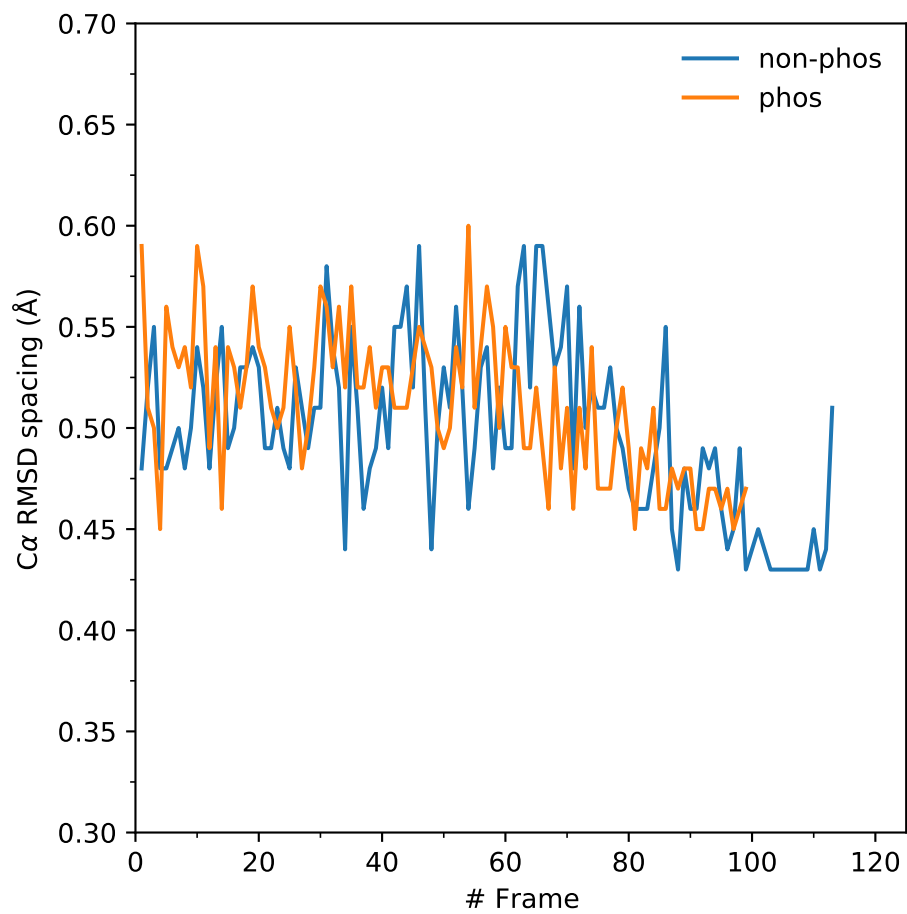

Figure S2:  $C\alpha$  RMSD spacing between the consecutive frames of the non-phos and the phos systems sampled from EDS. Note that each label on the X-axis represent the first frame index of the two consecutive frames.

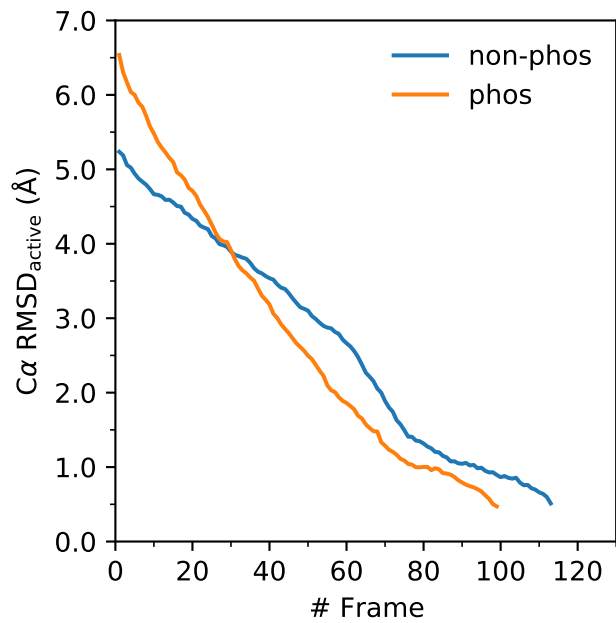

Figure S3: Variation in C $\alpha$  RMSD relative to the target active state (RMSD<sub>active</sub>) of the non-phos and the phos systems for the frames sampled from EDS.

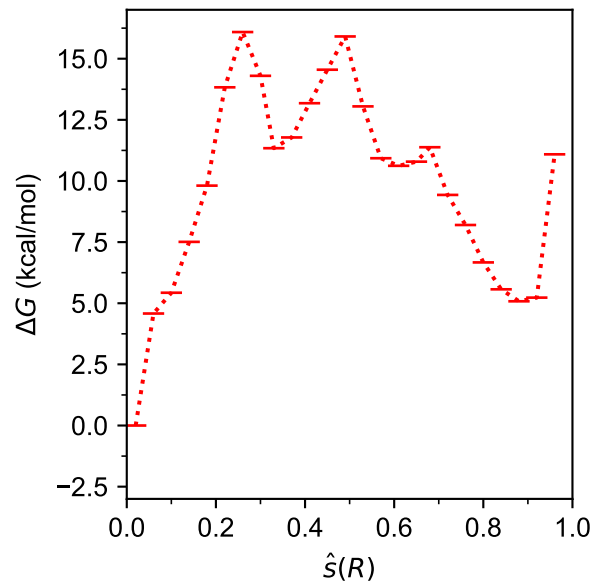

Figure S4: MFEF for activation of the phos system as a function of the  $\hat{s}(R)$  CV obtained from the wT-metaD simulations.

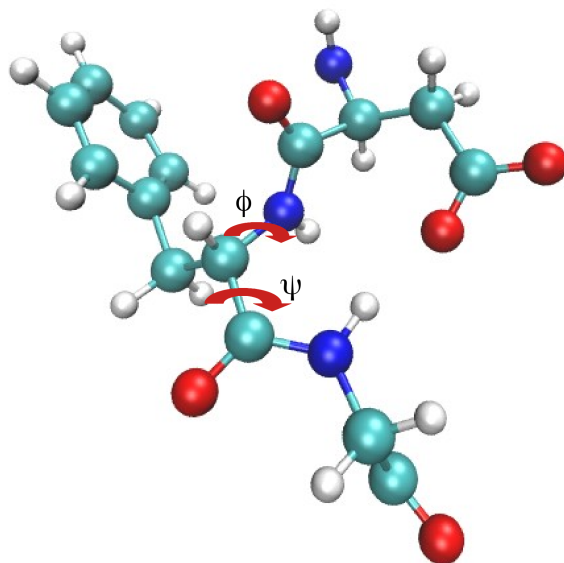

Figure S5: Ramachandran angles  $\psi$  and  $\phi$  of Phe<sup>382</sup> of the DFG motif.



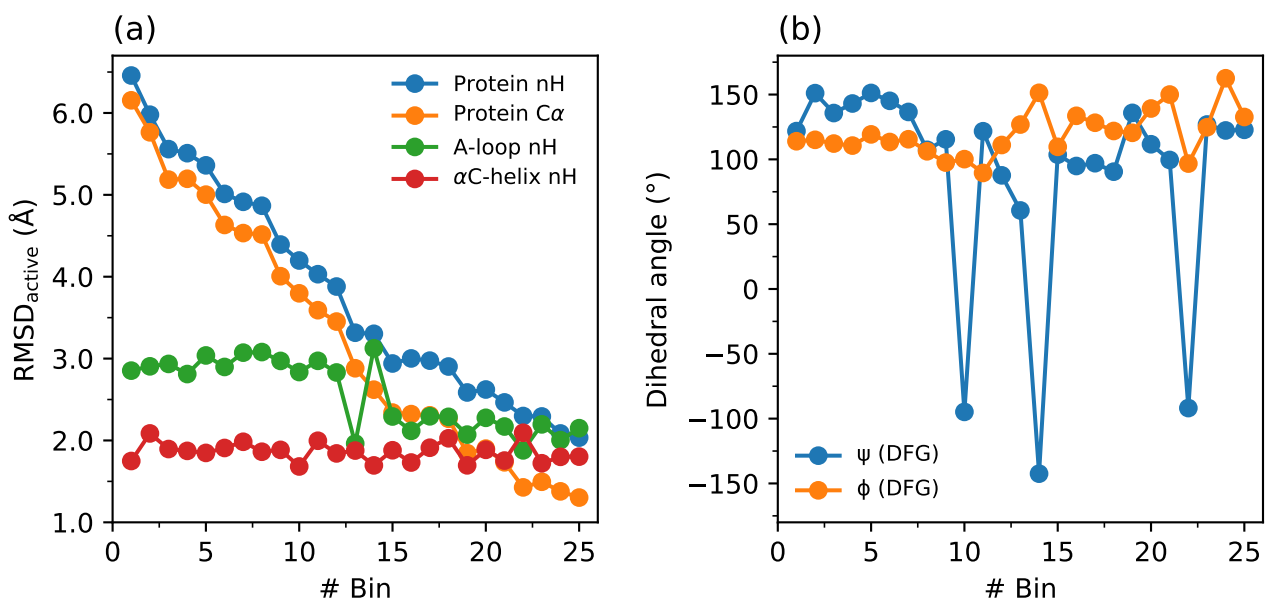

Figure S6: Variation in RMSD with respect to the target active state ( $\text{RMSD}_{\text{active}}$ ) (a), and variation in the Ramachandran angles  $\psi$  and  $\phi$  (b) during the MFEP of the phos system.

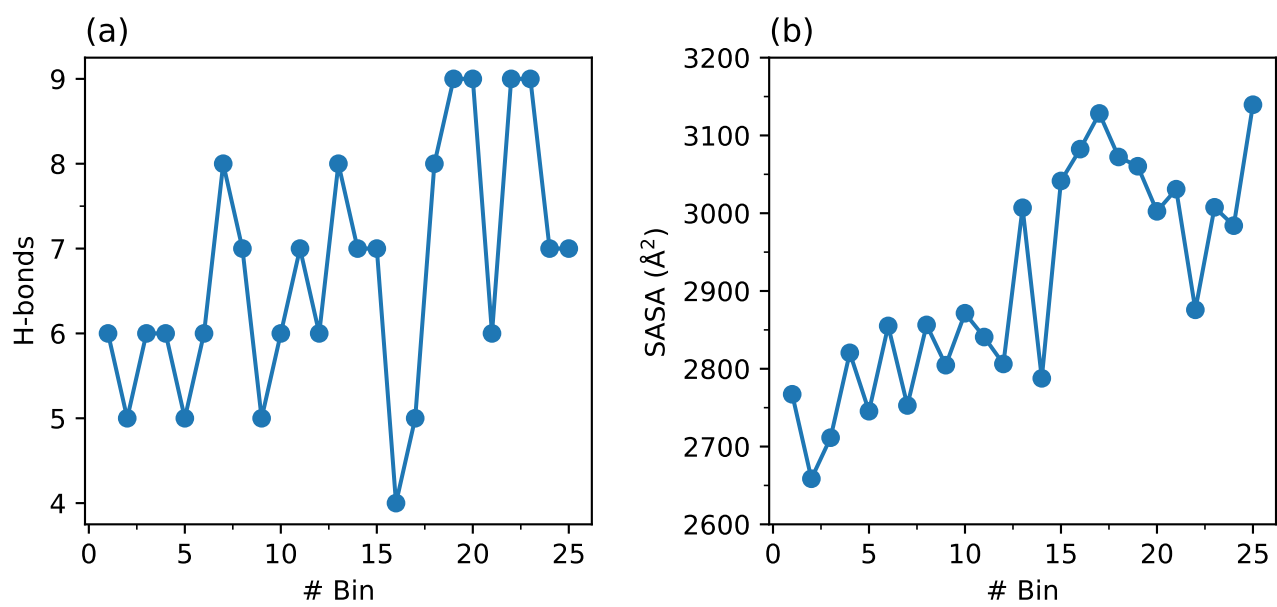

Figure S7: Variation in the A-loop SASA (a), and variation in the number of hydrogen bonds between the A-loop and the solvent (b) during the MFEP of the phos system.
